# Supplementary material for: Clinical value of bronchodilator response for diagnosing asthma in steroid-naïve adults
Source: PubMed Central journal article supplement — ERJ Open Res. 2021 Dec 13;7(4):00293-2021. doi: 10.1183/23120541.00293-2021 (PMC8666574; doi:10.1183/23120541.00293-2021), 2021-12-13
Supplement: 00293-2021.SUPPLEMENT.pdf [file 00293-2021.SUPPLEMENT.pdf]

## Online supplement

### Methods

Spirometries with bronchodilator test were performed according to international recommendations [S1,S2]. In hospital Vmax 22 (Vmax 22, Viasys Healthcare, Palm Springs, CA) was used and in GP offices M9426 spirometer (Medikro, Kuopio, Finland) was most often used. The quality of primary care spirometry in the study area has been previously analysed in detail and has been found good [S3]. Finnish reference values were used [S4]. Only spirometries of steroid-naïve patients were chosen, i.e. spirometries measured during glucocorticoid medication or <1 month from discontinuation were excluded as well as those with insufficient medication data (n=270). Also spirometries without bronchodilator test were excluded (n=129). Bronchodilator test was made by salbutamol 200 µg according to guidelines [S2,S5].

**eTable 1. Inclusion & exclusion criteria used in SAAS study<sup>S6</sup>**

|                    |                                                                                                                                                                                                                                                                                                                                                                                                                                                                                                                                                                                                                                                                                                                                                                                                                                                   |
|--------------------|---------------------------------------------------------------------------------------------------------------------------------------------------------------------------------------------------------------------------------------------------------------------------------------------------------------------------------------------------------------------------------------------------------------------------------------------------------------------------------------------------------------------------------------------------------------------------------------------------------------------------------------------------------------------------------------------------------------------------------------------------------------------------------------------------------------------------------------------------|
| Inclusion criteria | <ul style="list-style-type: none"><li>• a diagnosis of new-onset asthma made by a respiratory specialist</li><li>• diagnosis confirmed by at least one of the following objective lung function measurements<sup>1</sup>:<ul style="list-style-type: none"><li>○ FEV<sub>1</sub> reversibility in spirometry of at least 15% and 200 ml</li><li>○ diurnal variability (<math>\geq 20\%</math>) or repeated reversibility (<math>\geq 15\%/60</math> L/min) in PEF-follow-up</li><li>○ a significant decrease in FEV<sub>1</sub> (15%) or PEF (20%) in response to exercise or allergen</li><li>○ a significant reversibility in FEV<sub>1</sub> (at least 15% and 200 ml) or mean PEF (20%) in response to a trial with oral or inhaled glucocorticoids</li></ul></li><li>• symptoms of asthma</li><li>• age <math>\geq 15</math> years</li></ul> |
| Exclusion criteria | <ul style="list-style-type: none"><li>• physical or mental inability to provide signed informed consent</li><li>• of note:<ul style="list-style-type: none"><li>○ patients with comorbidities, either other lung disease or any other significant disease were not excluded</li><li>○ patients were not excluded because of smoking, alcohol use or any other lifestyle factor</li></ul></li></ul>                                                                                                                                                                                                                                                                                                                                                                                                                                                |

**eTable 2** Three most common methods to calculate the immediate FEV<sub>1</sub> BDR discussed in the recommendations, reports and guidelines for asthma and spirometry measurements

|                                                             | Unit                           | Calculation formula                                                               |
|-------------------------------------------------------------|--------------------------------|-----------------------------------------------------------------------------------|
| <b>Absolute volume change (ΔFEV<sub>1</sub>)</b>            | litres (L) or millilitres (mL) | <i>postbd FEV<sub>1</sub> – initial FEV<sub>1</sub></i>                           |
| <b>ΔFEV<sub>1</sub> % of the initial FEV<sub>1</sub></b>    | Percentage (%)                 | $\frac{\text{postbd FEV}_1 - \text{initial FEV}_1}{\text{initial FEV}_1} * 100$   |
| <b>ΔFEV<sub>1</sub> % of the predicted FEV<sub>1</sub>*</b> | Percentage (%)                 | $\frac{\text{postbd FEV}_1 - \text{initial FEV}_1}{\text{predicted FEV}_1} * 100$ |

postbd = post-bronchodilator, FEV<sub>1</sub>= forced expiratory volume in 1 second

\* Can also be expressed as the percent predicted FEV<sub>1</sub> after bronchodilator administration minus the percent predicted FEV<sub>1</sub> before bronchodilator administration

**eTable 3. Diagnostic criteria fulfilled by the patients in the SAAS-cohort.**

| Diagnostic criteria fulfilled                                                                                                         | n=219          |
|---------------------------------------------------------------------------------------------------------------------------------------|----------------|
| Positive BDR ( $\Delta FEV_1$ % of the initial $FEV_1 \geq 15\%$ and $\geq 200$ mL) at least in one spirometric measurement n (%)     | 72<br>(32.9%)  |
| <b>if not</b><br>Diurnal variability ( $\geq 20\%$ ) or repeated reversibility ( $\geq 15\%/60l/\text{min}$ ) in peak flow monitoring | 119<br>(54.3%) |
| <b>if not</b><br>Variable bronchial obstruction shown in exercise, allergen exposure or as a steroid treatment response               | 28<br>(12.8%)  |

*<sup>a</sup>Practically all patients underwent one or more spirometric evaluations and 2 week peak flow monitoring. Other tests were performed if considered necessary. Only the major diagnostic feature per patient is shown using a hierarchical evaluation in which positive bronchodilator response on  $FEV_1$  was considered first, if negative, then peak flow changes were considered and if negative, the other tests were considered.*

**eTable 4. Proportion of steroid-naïve patients (n=219) fulfilling at least one of the BDR thresholds among 369 study spirometries**

|                                                                                           |             |
|-------------------------------------------------------------------------------------------|-------------|
| <b>Absolute change <math>\geq 200</math> mL of <math>\Delta FEV_1</math></b>              | 128 (58.4%) |
| <b><math>\Delta FEV_1</math> % of the predicted <math>FEV_1 \geq 8\%</math></b>           | 95 (43.6%)  |
| <b><math>\Delta FEV_1</math> % of the predicted <math>FEV_1 \geq 9\%</math></b>           | 79 (36.1%)  |
| <b><math>\Delta FEV_1</math> % of the initial <math>FEV_1 \geq 12\%</math> and 200 mL</b> | 78 (35.6%)  |
| <b><math>\Delta FEV_1</math> % of the predicted <math>FEV_1 \geq 10\%</math></b>          | 65 (29.8%)  |
| <b><math>\Delta FEV_1</math> % of the initial <math>FEV_1 \geq 15\%</math> and 200 mL</b> | 58 (26.5%)  |
| <b>Absolute change <math>\geq 400</math> mL of <math>\Delta FEV_1</math></b>              | 53 (24.2%)  |
| <b><math>\Delta FEV_1</math> % of the initial <math>FEV_1 \geq 12\%</math> and 400 mL</b> | 46 (21.0%)  |
| <b><math>\Delta FEV_1</math> % of the initial <math>FEV_1 \geq 15\%</math> and 400 mL</b> | 40 (18.3%)  |
| <b>None of the criterion was fulfilled</b>                                                | 91 (41.6%)  |

Data is shown as n (%)

**eTable 5** Differences of the subgroups of patients fulfilling absolute volume of  $\Delta\text{FEV}_1 \geq 200\text{mL}$  and either  $\Delta\text{FEV}_1\%$  of the initial  $\text{FEV}_1 \geq 12\%$  or  $\Delta\text{FEV}_1\%$  of the predicted  $\text{FEV}_1 \geq 9\%$

|                                                                                                                        | $\Delta\text{FEV}_1\%$ of the<br>initial $\text{FEV}_1 \geq 12\%$ | $\Delta\text{FEV}_1\%$ of the<br>predicted $\text{FEV}_1 \geq 9\%$ | P value          |
|------------------------------------------------------------------------------------------------------------------------|-------------------------------------------------------------------|--------------------------------------------------------------------|------------------|
|                                                                                                                        | n=9                                                               | n=10                                                               |                  |
| <b>Male gender</b>                                                                                                     | 5 (55.6%)                                                         | 7 (70.0 %)                                                         | 0.650            |
| <b>Age</b>                                                                                                             | 50 (10)                                                           | 39 (11)                                                            | <b>0.032</b>     |
| <b>BMI</b>                                                                                                             | 25.3 (23.6-30.3)                                                  | 25.0 (23.5-28.2)                                                   | 0.842            |
| <b>Smoking history</b>                                                                                                 | 5 (55.6%)                                                         | 7 (70%)                                                            | 0.650            |
| <b>Current smoker</b>                                                                                                  | 1 (11.1%)                                                         | 4 (40%)                                                            | 0.303            |
| <b>Pack years</b>                                                                                                      | 15 (4.5-31.5)                                                     | 5 (3.5-11)                                                         | 0.343            |
| <b>Atopic</b>                                                                                                          | 2 (25%)                                                           | 4 (50%)                                                            | 0.608            |
| <b>Pre-BD <math>\text{FEV}_1</math> (%ref)</b>                                                                         | 52 (14)                                                           | 92 (8)                                                             | <b>&lt;0.001</b> |
| <b>Post-BD <math>\text{FEV}_1</math> (%ref)</b>                                                                        | 59 (15)                                                           | 102 (9)                                                            | <b>&lt;0.001</b> |
| <b>Pre-BD FVC (%ref)</b>                                                                                               | 65 (13)                                                           | 102 (10)                                                           | <b>&lt;0.001</b> |
| <b>Post-BD FVC (%ref)</b>                                                                                              | 71 (15)                                                           | 106 (8)                                                            | <b>&lt;0.001</b> |
| <b>Pre-BD <math>\text{FEV}_1</math> (L)</b>                                                                            | 1.90 (0.49)                                                       | 3.91 (0.81)                                                        | <b>&lt;0.001</b> |
| <b>Post-BD <math>\text{FEV}_1</math> (L)</b>                                                                           | 2.18 (0.54)                                                       | 4.34 (0.89)                                                        | <b>&lt;0.001</b> |
| <b>Pre-BD FVC (L)</b>                                                                                                  | 2.96 (0.57)                                                       | 5.22 (1.19)                                                        | <b>&lt;0.001</b> |
| <b>Post-BD FVC (L)</b>                                                                                                 | 3.22 (0.58)                                                       | 5.40 (1.05)                                                        | <b>&lt;0.001</b> |
| <b>Pre-BD <math>\text{FEV}_1/\text{FVC}</math></b>                                                                     | 0.64 (0.10)                                                       | 0.76 (0.07)                                                        | <b>0.008</b>     |
| <b>Post-BD <math>\text{FEV}_1/\text{FVC}</math></b>                                                                    | 0.68 (0.09)                                                       | 0.80 (0.06)                                                        | <b>0.002</b>     |
| <b>FEV1 reversibility, ml</b>                                                                                          | 283 (67)                                                          | 428 (88)                                                           | <b>0.001</b>     |
| <b>FVC reversibility, ml</b>                                                                                           | 261 (196)                                                         | 179 (200)                                                          | 0.380            |
| <b>FEV1 reversibility, % of initial value</b>                                                                          | 15.2 (3.0)                                                        | 11.0 (0.8)                                                         | <b>&lt;0.001</b> |
| <b>FVC reversibility, % of initial value</b>                                                                           | 9.1 (7.0)                                                         | 4.4 (5.6)                                                          | 0.125            |
| <b>FEV1 reversibility, % of predicted</b>                                                                              | 7.6 (1.4)                                                         | 10.1 (1.1)                                                         | <b>0.001</b>     |
| <b>Blood eosinophils <math>\times 10^9/\text{L}</math></b>                                                             | 0.50 (0.16-0.73)                                                  | 0.34 (0.11-0.60)                                                   | 0.604            |
| <b>Total IgE kU/L</b>                                                                                                  | 74 (23-107)                                                       | 71 (44-331)                                                        | 0.481            |
| <b>Fulfills COPD criteria (<math>\geq 10</math> pack years and post-<math>\text{FEV}_1/\text{FVC} &lt; 0.7</math>)</b> | 2 (22.2%)                                                         | 0                                                                  | 0.211            |

Data is shown as n (%)

**eTable 6.** Baseline characteristics of the patients with pre-bronchodilator FEV<sub>1</sub>/FVC  $\geq 0.7$  vs. FEV<sub>1</sub>/FVC  $< 0.7$

|                                                                                                                    | pre-BD FEV <sub>1</sub> /FVC $\geq 0.7$ | pre-BD FEV <sub>1</sub> /FVC $< 0.7$ |                  |
|--------------------------------------------------------------------------------------------------------------------|-----------------------------------------|--------------------------------------|------------------|
|                                                                                                                    | n=151                                   | n=68                                 |                  |
| <b>Age</b>                                                                                                         | 45 (15)                                 | 50 (15)                              | <b>0.028</b>     |
| <b>Female gender</b>                                                                                               | 95 (62.9 %)                             | 31 (45.6 %)                          | <b>0.019</b>     |
| <b>BMI</b>                                                                                                         | 27.1 (24.1-30.9)                        | 27.2 (23.6-30.1)                     | 0.695            |
| <b>Smoking history</b>                                                                                             | 70 (46.4 %)                             | 43 (63.2 %)                          | <b>0.028</b>     |
| <b>Current smokers</b>                                                                                             | 30 (19.9 %)                             | 15 (22.1 %)                          | 0.720            |
| <b>Pack years</b>                                                                                                  | 11 (4-20)                               | 15 (9-26)                            | 0.098            |
| <b>Blood eosinophils x10<sup>9</sup>/L</b>                                                                         | 0.24 (0.18-0.40)                        | 0.30 (0.17-0.50)                     | 0.935            |
| <b>Total IgE kU/L</b>                                                                                              | 99 (34-198)                             | 71 (29-111)                          | 0.160            |
| <b>Atopic</b>                                                                                                      | 51 (37.5 %)                             | 16 (27.1 %)                          | 0.190            |
| <b>Pre-BD FEV<sub>1</sub> (L)</b>                                                                                  | 2.9 (2.4-3.5)                           | 2.1 (1.7-2.8)                        | <b>&lt;0.001</b> |
| <b>Post-BD FEV<sub>1</sub> (L)</b>                                                                                 | 3.1 (2.5-3.7)                           | 2.5 (2.0-3.2)                        | <b>&lt;0.001</b> |
| <b>Pre-BD FVC (L)</b>                                                                                              | 3.6 (3.0-4.4)                           | 3.5 (2.8-4.4)                        | 0.508            |
| <b>Post-BD FVC (L)</b>                                                                                             | 3.7 (3.2-4.6)                           | 3.8 (3.2-4.6)                        | 0.859            |
| <b>Pre-BD FEV<sub>1</sub> (%ref)</b>                                                                               | 84 (14)                                 | 64 (15)                              | <b>&lt;0.001</b> |
| <b>Post-BD FEV<sub>1</sub> (%ref)</b>                                                                              | 91 (15)                                 | 74 (17)                              | <b>&lt;0.001</b> |
| <b>Pre-BD FVC (%ref)</b>                                                                                           | 88 (16)                                 | 84 (17)                              | 0.129            |
| <b>Post-BD FVC (%ref)</b>                                                                                          | 93 (15)                                 | 90 (17)                              | 0.207            |
| <b>Pre-FEV<sub>1</sub>/FVC, ratio</b>                                                                              | 0.79 (0.75-0.84)                        | 0.64 (0.59-0.67)                     | <b>&lt;0.001</b> |
| <b>Post-FEV<sub>1</sub>/FVC, ratio</b>                                                                             | 0.82 (0.79-0.87)                        | 0.69 (0.62-0.74)                     | <b>&lt;0.001</b> |
| <b>Fulfills COPD criteria (<math>\geq 10</math> pack years and post-FEV<sub>1</sub>/FVC <math>&lt; 0.7</math>)</b> | 3 (2 %)                                 | 21 (32.3 %)                          | <b>&lt;0.001</b> |

Data is shown as n (%)

**eTable 7.** Diagnostic criteria fulfilled by the obstructive and non-obstructive patients<sup>a</sup> in the SAAS-cohort.

|                                                                                                                                                         | pre-BD FEV <sub>1</sub> /FVC $\geq 0.7$ | pre-BD FEV <sub>1</sub> /FVC $< 0.7$ | P value |
|---------------------------------------------------------------------------------------------------------------------------------------------------------|-----------------------------------------|--------------------------------------|---------|
| <b>Subjects</b>                                                                                                                                         | 151                                     | 68                                   |         |
| Positive BDR ( $\Delta$ FEV <sub>1</sub> % of the initial FEV <sub>1</sub> $\geq 15\%$ and $\geq 200$ mL) at least in one spirometric measurement n (%) | 39<br>(25.8%)                           | 33 <sup>†</sup><br>(48.5%)           | 0.001   |
| <b>if not</b><br>Diurnal variability ( $\geq 20\%$ ) or repeated reversibility ( $\geq 15\%/60$ l/ min) in peak flow monitoring                         | 94<br>(62.3%)                           | 25 <sup>†</sup><br>(36.8%)           |         |
| <b>if not</b><br>Variable bronchial obstruction shown in exercise, allergen exposure or as a steroid treatment response                                 | 18<br>(11.9%)                           | 10<br>(14.7%)                        |         |

<sup>†</sup> p<0.05 vs. group with pre-BD FEV<sub>1</sub>/FVC  $\geq 0.7$ , BD=bronchodilator, BDR=bronchodilator response

**eTable 8. Predicting fulfilling threshold of 12% and 200ml FEV<sub>1</sub> reversibility by pre-BD FEV<sub>1</sub>/FVC ratio**

|                                |             |
|--------------------------------|-------------|
| AUC                            | 0.71 (fair) |
| p-value                        | <0.001      |
| Lower AUC boundary (of 95% CI) | 0.632       |
| Upper AUC boundary (of 95% CI) | 0.788       |
| Cut-off point                  | 0.7205      |
| Sensitivity %                  | 67.2        |
| Specificity %                  | 74.7        |

|                 | Predicted positive | Predicted negative | Total      |
|-----------------|--------------------|--------------------|------------|
| Actual positive | 41 (67.2%)         | 20 (32.8%)         | 61 (100%)  |
| Actual negative | 40 (25.3%)         | 118 (74.7%)        | 158 (100%) |

Accuracy  $41+118 / (41+20+40+118) = 72.6\%$

**eFigure 1. Receiver-operation characteristic (ROC) curve for the performance of FEV<sub>1</sub>/FVC for predicting fulfilling FEV<sub>1</sub> reversibility threshold 12% and 200 mL**

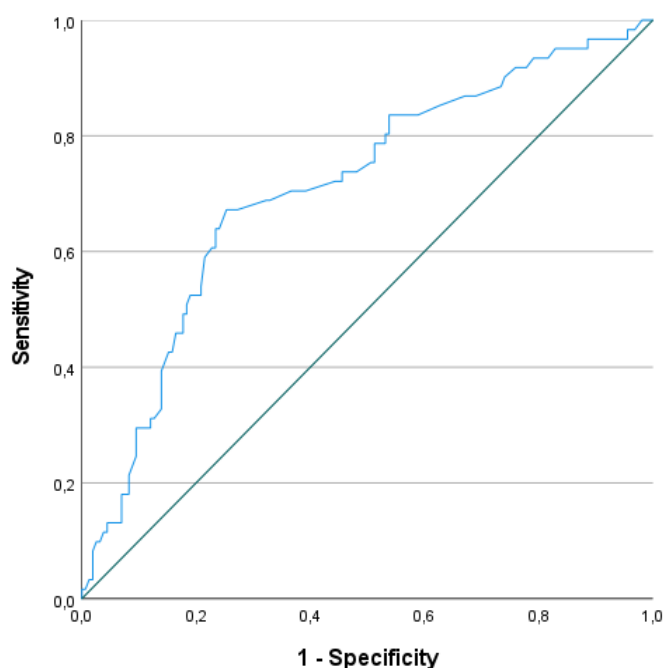

- S1. Quanjer PH, Tammeling GJ, Cotes JE, Pedersen OF, Peslin R, Yernault JC. Lung volumes and forced ventilatory flows. Report Working Party Standardization of Lung Function Tests, European Community for Steel and Coal. Official Statement of the European Respiratory Society. *Eur Respir J* 1993; 6: Suppl. 16, 5–40.
- S2. American Thoracic Society. Standardisation of spirometry:1994 update. *Am J Respir Crit Care Med* 1995;152:1107-36.
- S3. Tuomisto L.E. et al. Asthma Programme in Finland: the quality of primary care spirometry is good. *Prim Care Respir J*. 2008;17:226-231.
- S4. Viljanen AA, Halttunen PK, Kreus KE, Viljanen BC. Spirometric studies in non-smoking health adults. *Scand J Clin Lab Invest* 1982;159:5-20.
- S5. Sovijärvi ARA, Piirilä P, Korhonen O, Louhivuoto E, Pekkanen L, Forstedt M. Performance and evaluation of spirometric and PEF measurements, offprint 3. KP-paino, Kokkola: Kliinisten Laboratoriotutkimusten Laaduntarkkailu Oy; Moodi 1995 [in Finnish]
- S6. Kankaanranta H, Ilmarinen P, Kankaanranta T, et al. Seinäjoki Adult Asthma Study (SAAS): a protocol for a 12-year real-life follow-up study of new-onset asthma diagnosed at adult age and treated in primary and specialised care. *NPJ Prim Care Respir Med* 2015;25:15042.
